# Supplementary material for: Estrogen receptor β promotes bladder cancer growth and invasion via alteration of miR-92a/DAB2IP signals
Source: PubMed Central journal article supplement (PMC6243995; doi:10.1038/s12276-018-0155-5), 2018-11-20

## Figure Legends

Supplementary Figure 1. QRT-PCR results showed the ER  $\beta$  mRNA、miRNA-92a and DAB2IP mRNA expressing levels in the peritoneal metastatic foci in different groups of mice.

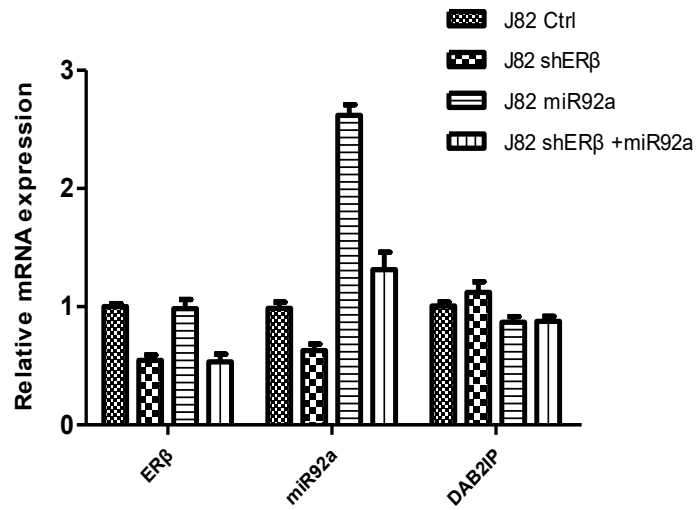

Supplement: 12276_2018_155_MOESM1_ESM.pdf [file 12276_2018_155_MOESM1_ESM.pdf]
